# Supplementary material for: NF‐κB activation in astrocytes drives a stage‐specific beneficial neuroimmunological response in ALS
Source: PubMed Central journal article supplement — EMBO J. 2018 Jun 6;37(16):e98697. doi: 10.15252/embj.201798697 (PMC6092622; doi:10.15252/embj.201798697), 2018-06-06
Supplement: EMBJ-37-e98697-s001.pdf [file EMBJ-37-e98697-s001.pdf]

# Table of contents

**Appendix Figure S1**

**Appendix Figure S2**

**Appendix Figure S3**

**Appendix Figure S4**

**Appendix Figure S5**

**Appendix Figure legends S1, S2, S3, S4, S5**

**Appendix Table S1.** List of Antibodies and other biological reagents

**Appendix Table S2.** List of primers

# Appendix Figure S1

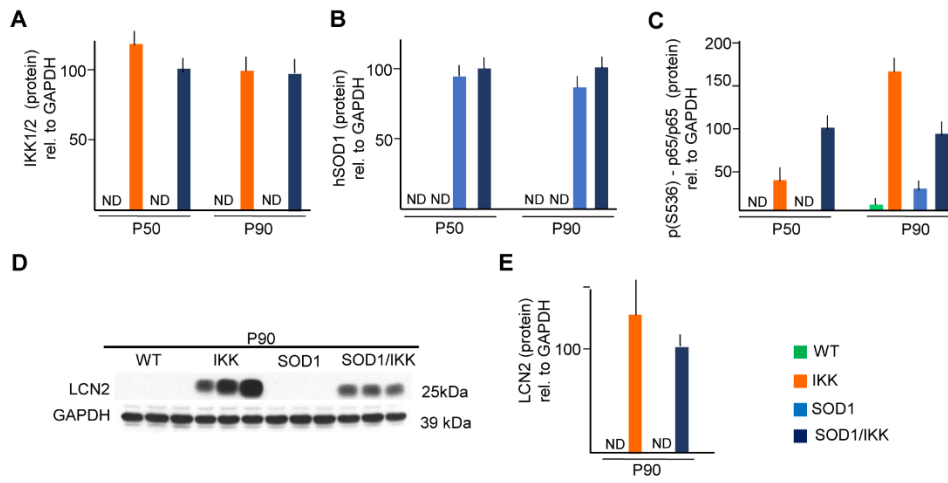

# Appendix Figure S2

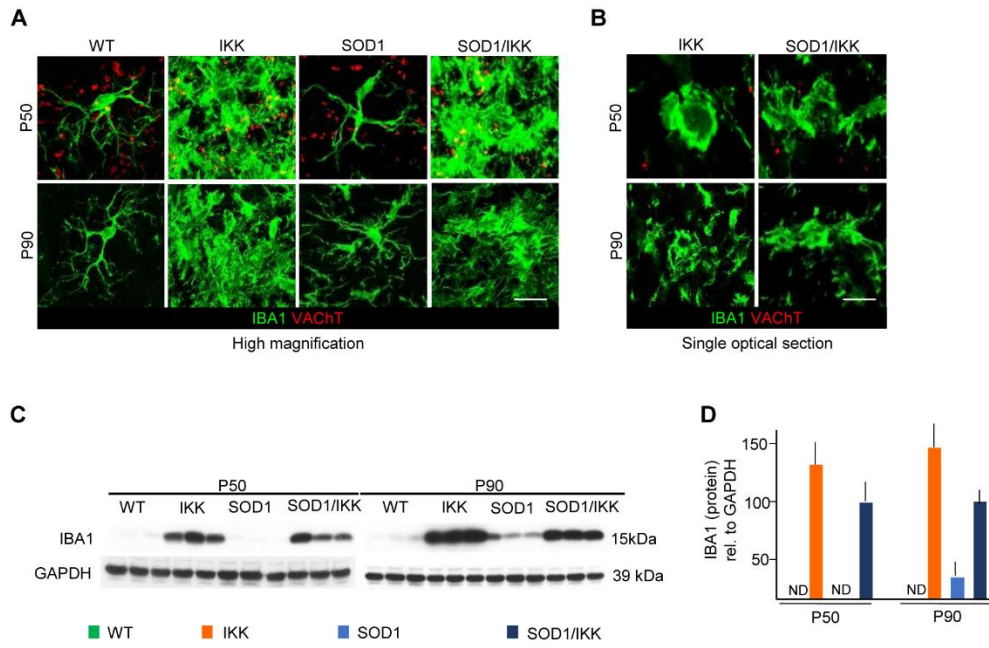

# Appendix Figure S3

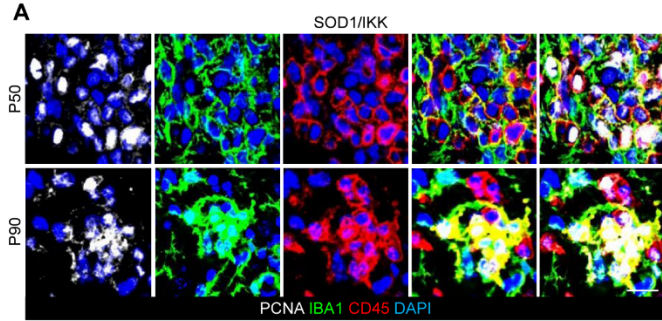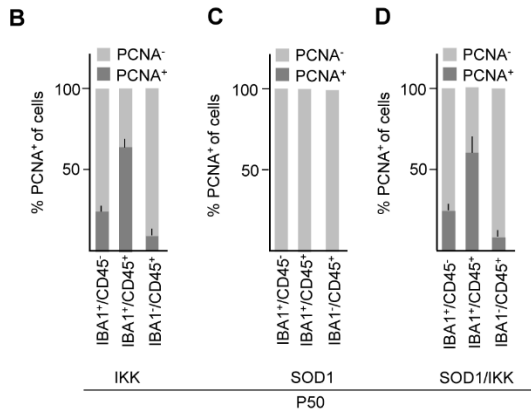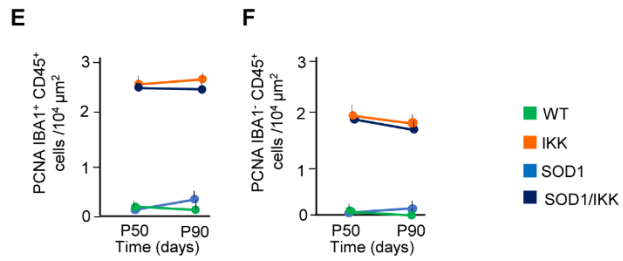

## Appendix Figure S4

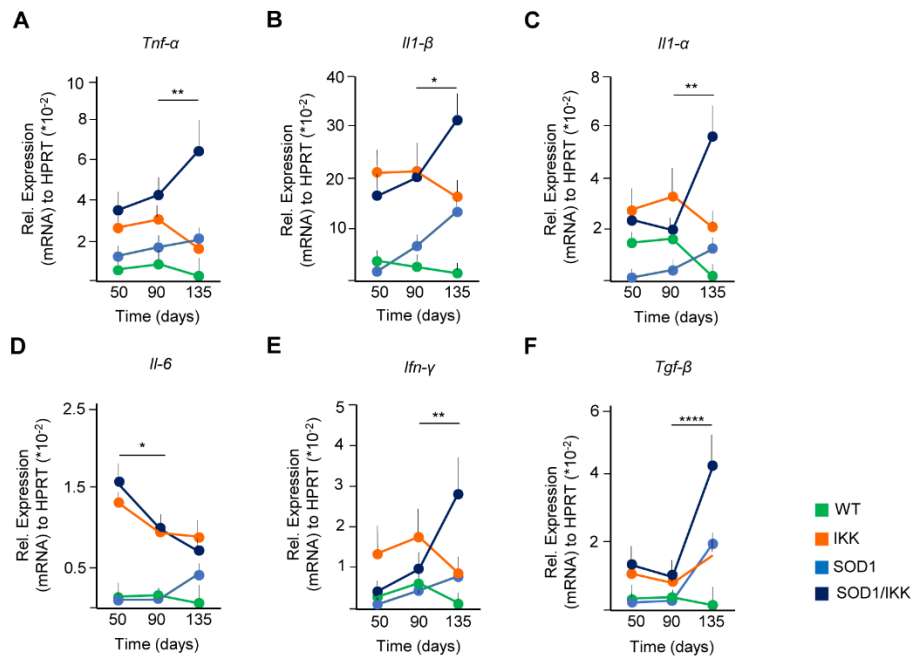

# Appendix Figure S5

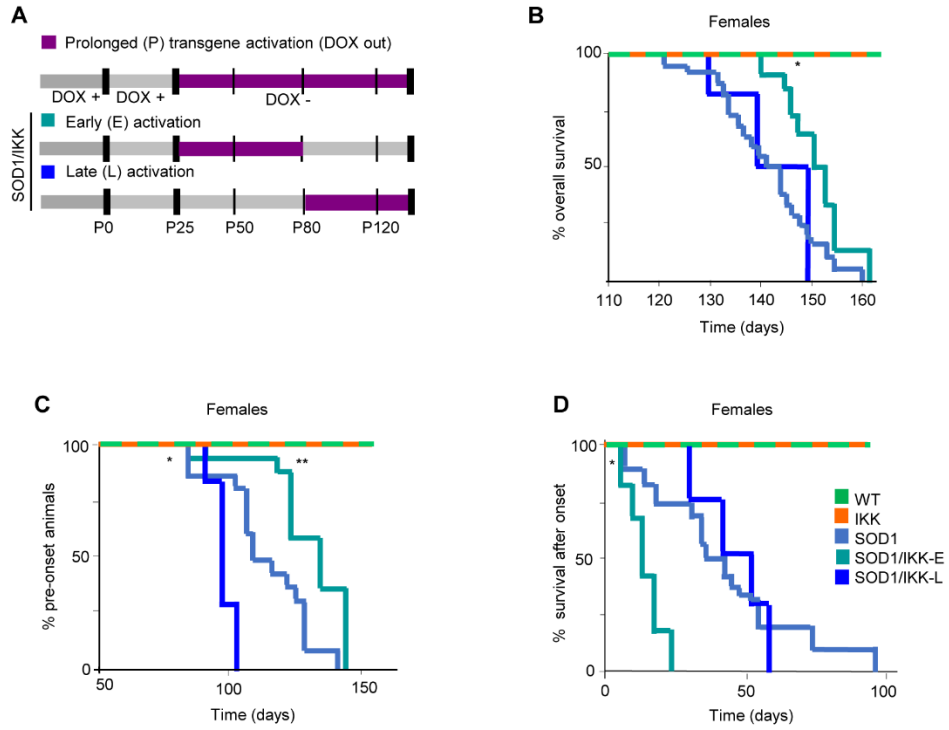

**Appendix Figure S1 - Functional characterization of transgene expression in GFAP.tTA/(tetO)7.IKK2-CA/SOD1(G93A) mice and littermates.**

A Quantification of IKK2-CA transgene protein reveals strong expression in IKK and SOD1//IKK mice.

B Quantification of SOD1 protein shows comparable expression in SOD1 and SOD1//IKK mice.

C Quantification of the ratio of phosphorylated p65 and total p65 reveals prominently elevated levels in IKK and SOD1//IKK mice.

D Western blot showing strong expression of the NF- $\kappa$ B target gene LCN2 in IKK and SOD1//IKK mice. GAPDH loading control is identical to Fig 1E.

E WB quantification of LCN2 expression shown in (D).

Data information: All quantifications are performed relative to GAPDH (loading control; in case of C total p65 was included) and are related to Fig 1E. All data are acquired from WT, IKK, SOD1 and SOD1//IKK as indicated. Error bars are represented as SD. ND = not detectable; (n=3-4).

**Appendix Figure S2 - IKK/NF- $\kappa$ B activation in astrocytes induces expansion of microglia.**

A High-magnification analysis of IBA1 immunostaining shown in Fig 2D for WT, IKK, SOD1 and SOD1//IKK animals at P50 and P90. Scale bar 5  $\mu$ m.

B Single optical sections of IBA1 staining of IKK and SOD1//IKK at P50 and P90. Scale bar 5  $\mu$ m.

C Immunoblot confirming the increase of 15 kDa IBA1 expression in IKK and SOD1//IKK at P50 and P90 in the spinal cord. GAPDH loading control is identical to Fig 1E.

D Quantification of IBA1 protein expression levels at P50 and P90 in the spinal cord relative to GAPDH. Error bars are represented as SD. ND = not detectable; (n=3-4).

**Appendix Figure S3 - NF- $\kappa$ B activation in astrocytes induces microglia expansion sustained by proliferation.**

A Co-immunostaining of PCNA (white), IBA1 (green), CD45 (red) and DAPI (blue) in ventral horn spinal cord sections of SOD1//IKK mice at P50 and P90. Scale bar 10  $\mu$ m.

B–D Quantification of proliferating immune cells (IBA1<sup>+</sup>, IBA1<sup>+</sup>/CD45<sup>+</sup> IBA1<sup>-</sup>/CD45<sup>+</sup>) in (B) IKK, (C) SOD1 and (D) SOD1//IKK mice at P50 (expressed as %). Data are presented as means  $\pm$  SD; (n=4)

E Quantification of PCNA<sup>+</sup>/IBA1<sup>+</sup>/CD45<sup>+</sup> cell density in WT, IKK, SOD1 and SOD1/IKK mice at P50 and P90. Data are presented as means  $\pm$  SD; (n=4)

F Quantification of proliferating IBA1<sup>+</sup>/CD45<sup>+</sup> cells in WT, IKK, SOD1 and SOD1/IKK mice at P50 and P90; Data are presented as means  $\pm$  SD; (n=4).

**Appendix Figure S4 - Analysis of the cytokine expression pattern in the lumbar spinal cord over time.**

A–F Gene expression analysis (relative to HPRT) of different cytokines: (A) *TNF- $\alpha$* , (B) *IL- $\beta$* , (C) *IL-1- $\alpha$* , (D) *IL-6*, (E) *IFN- $\gamma$*  and (F) *TGF- $\beta$*  in WT, IKK, SOD1 and SOD1/IKK mice lumbar spinal cords across timepoints P50, P90 and P135; (n=3-4). Two-way ANOVA. Data are shown as means  $\pm$  SD, \*p $\leq$ 0.05; \*\* p $\leq$ 0.01; \*\*\*\* p $\leq$ 0.0001.

**Appendix Figure S5 - Time dependent activation of IKK/NF- $\kappa$ B in female SOD1/IKK affects disease onset and progression.**

A Experimental design illustrating the different time windows of transgene activation induced by DOX withdrawal (DOX out, purple): Prolonged (P, shown in Fig EV2), Early (E; turquoise) and Late (L; dark blue) in female SOD1/IKK mice.

B Kaplan-Meier curves of SOD1/IKK mice survival in the E and L transgene activation modus compared to SOD1 (light blue) female mice. The analysis reveals no effect of late-activation of the transgene (SOD1/IKK-L vs SOD1: Mantel-Cox p=0.34), but shows significant prolongation of survival in the early-only activation modus of NF- $\kappa$ B (SOD1/IKK-E vs SOD1: Mantel-Cox \*p=0.0327).

C Kaplan-Meier curves representing % of presymptomatic female mice as function of time for SOD1/IKK animals in the E and L, showing a delayed onset for SOD1/IKK-E female mice (SOD1/IKK-L vs SOD1: Mantel-Cox \*p=0.0281; SOD1/IKK-E vs SOD1: Mantel-Cox \*\*p=0.00435).

D Kaplan-Meier curves representing the time spent in the progression phase of SOD1/IKK-E and L compared to SOD1 mice. The curves show a significantly shortened progression phase for SOD1/IKK-E female mice (Mantel-Cox \*p=0.0127).



**Appendix Table S1.** List of Antibodies and other biological reagents

| REAGENT or RESOURCE                                                            | DILUTION        | APPLICATION | SOURCE                    | IDENTIFIER                    |
|--------------------------------------------------------------------------------|-----------------|-------------|---------------------------|-------------------------------|
| Antibodies                                                                     |                 |             |                           |                               |
| Rabbit polyclonal anti-IKK $\alpha/\beta$ (clone H-470)                        | 1:750<br>1:100  | WB<br>IF    | Santa Cruz Biotechnology  | Ca#sc-7607;RRID:AB_675667     |
| Rabbit polyclonal anti-SOD1                                                    | 1:1000          | WB          | Abcam                     | Ca#ab16831;RRID:AB_302535     |
| Rabbit polyclonal anti-GAPDH                                                   | 1:3000          | WB          | Santa Cruz Biotechnology  | Ca#sc-25778;RRID:AB_10167668  |
| Rabbit polyclonal anti-phospho-NK- $\kappa$ B p65 (Ser536) (93H1)              | 1:1000          | WB          | Cell Signaling Technology | Ca#3033;RRID:AB_331284        |
| Rabbit polyclonal anti-NK- $\kappa$ B p65                                      | 1:1000          | WB          | Santa Cruz Biotechnology  | Ca#sc-372;RRID:AB_632037      |
| Goat polyclonal anti-Lcn2                                                      | 1:2000          | WB          | R&D systems               | Ca#AF1857;RRID:AB_355022      |
| Rabbit monoclonal anti-NF- $\kappa$ B p65 (D14E12) XP $\text{\textcircled{R}}$ | 1:500           | IF          | Cell Signaling Technology | Ca#8242; RRID:AB_10859369     |
| Rabbit monoclonal anti-Ki-67 (clone SP6)                                       | 1:500           | IF          | Thermo Fisher Scientific  | Ca#RM-9106-S0;RRID:AB_2341197 |
| Mouse monoclonal Anti-PCNA                                                     | 1:150           | IF          | Millipore                 | Cat#NA03;RRID:AB_2160355      |
| Rabbit polyclonal anti-Iba-1                                                   | 1:200<br>1:1000 | IF<br>WB    | Wako                      | Ca#019-19741;RRID:AB_839504   |

|                                                            |        |    |                           |                                      |
|------------------------------------------------------------|--------|----|---------------------------|--------------------------------------|
| Rat monoclonal anti-CD11b (clone 5C6)                      | 1:100  | IF | AbD Serotec               | Ca#MCA 711G;<br>RRID:<br>AB_323167   |
| Rat anti-mouse CD45 purified (clone 30-F11)                | 1:350  | IF | BD Bioscience             | Ca#550539;<br>RRID: AB_21744<br>26   |
| Mouse monoclonal anti-CD68 (clone ED1)                     | 1:200  | IF | Abcam                     | Ca#ab31630;<br>RRID:<br>AB_1141557   |
| Rabbit polyclonal anti-CD206                               | 1:100  | IF | Abcam                     | Ca#ab64693;<br>RRID: AB_15239<br>10  |
| Rabbit polyclonal anti-CD3                                 | 1:250  | IF | Abcam                     | Ca#ab5690;<br>RRID: AB_30505<br>5    |
| Rabbit polyclonal anti-GFAP                                | 1:250  | IF | Abcam                     | Ca#ab7260;<br>RRID: AB_30580<br>8    |
| Mouse monoclonal anti-GFAP (clone G-A-5)                   | 1:400  | IF | Sigma-Aldrich             | Ca#G3893;<br>RRID: AB_47701<br>0     |
| Goat polyclonal anti-VACHT Violet 421 (clone C068C2)       | 1:300  | IF | Millipore                 | Ca#ABN100;<br>RRID: AB_26303<br>94   |
| Rabbit monoclonal anti-LC3A (D50G8) XP®                    | 1:400  | IF | Cell Signaling Technology | Ca#4599; RRID:<br>AB_10548192        |
| Mouse anti-Misfolded Human SOD1 (B8H10) (clone C4F6)       | 1:1000 | IF | Medimabs                  | Ca#MM-0070;<br>RRID: AB_10015<br>296 |
| Mouse monoclonal anti-SQSTM1/p62                           | 1:500  | IF | Abcam                     | Ca#ab56416;<br>RRID: AB_94562<br>6   |
| Guinea pig polyclonal anti-Synaptophysin 1                 | 1:250  | IF | Synaptic Systems          | Ca#101004;<br>RRID: AB_12103<br>82   |
| α-Bungarotoxin conjugates Alexa Fluor® 555                 | 1:500  | IF | Molecular Probes™         | Ca#B35451;<br>RRID: AB_23139<br>31   |
| RatlgG <sub>2A</sub> monoclonal anti-Wnt-5a (clone 442625) | 1:100  | IF | R&D systems               | Ca#MAB645;<br>RRID: AB_10571<br>221  |

|                                                            |       |    |                          |                                        |
|------------------------------------------------------------|-------|----|--------------------------|----------------------------------------|
| Monoclonal anti-Human CD163 PE (clone GHI/61)              | 1:50  | FC | eBioscience              | Ca#12-1639-41;<br>RRID: AB_1963571     |
| Rat monoclonal anti-CD11b FITC (clone M1/70)               | 1:50  | FC | BD Bioscience            | Ca#557396;<br>RRID:<br>AB_396679       |
| Rat monoclonal anti-CD45 APC-Cy7 conjugated (clone 30-F11) | 1:50  | FC | BD Bioscience            | Ca#557659;<br>RRID:<br>AB_396774       |
| Rabbit polyclonal anti-galectine-3 (H-160)                 | 1:100 | IF | Santa Cruz Biotechnology | Cat#sc-20157;<br>RRID:<br>AB_2136784   |
| Rabbit monoclonal anti-TMEM119 [28-3]                      | 1:100 | IF | Abcam                    | Cat#ab209064;<br>RRID:<br>AB_2687894   |
| Mouse monoclonal F 4/80 Antigen (clone Cl:A3-1)            | 1:200 | IF | Peninsula Laboratories   | Cat#T-2008.0500;<br>RRID:<br>AB_518460 |
| Rat monoclonal anti-CD169 (clone MOMA-1)                   | 1:100 | IF | Bio-Rad                  | Ca#MCA947;<br>RRID:<br>AB_322323       |
| Rat monoclonal anti-CD4 (clone 4SM95)                      | 1:50  | IF | eBioscience              | Ca#14976680;<br>RRID:<br>AB_2573007    |
| Guinea pig polyclonal anti-VACHT                           | 1:100 | IF | Synaptic Systems         | Ca#139105;<br>RRID:<br>AB_10893979     |
| Rabbit polyclonal anti-Collagen IV                         | 1:200 | IF | Abcam                    | Ca#ab6586;<br>RRID:<br>AB_305584       |
| Goat polyclonal antibody anti-Albumin                      | 1:50  | IF | Santa Cruz Biotechnology | Ca#sc-46289;<br>RRID:<br>AB_633767     |
| Goat polyclonal ant-8-Hydroxydeoxyguanosine                | 1:100 | IF | Millipore                | Ca#AB5830;<br>RRID: AB_92060           |

|                                                              |       |    |                           |                                 |
|--------------------------------------------------------------|-------|----|---------------------------|---------------------------------|
| Rabbit polyclonal anti-Cleaved Caspase-3 (Asp175)            | 1:100 | IF | Cell Signaling Technology | Ca#9661; RRID: AB_2341188       |
| Mouse monoclonal anti-Wnt7a(E-9)                             | 1:100 | IF | Santa Cruz Biotechnology  | Ca#sc-365665; RRID:AB_10846318  |
| Mouse monoclonal anti-CD11c (clone 3.9)                      | 1:100 | IF | Abcam                     | Ca#ab11029; RRID: AB_297683     |
| Rabbit polyclonal anti-CD11c                                 | 1:500 | IF | Synaptic Systems          | Ca#375003; RRID: AB_2630323     |
| Rabbit polyclonal anti-CD8                                   | 1:30  | IF | Bioss Inc                 | Ca#bs-0648R; RRID:AB_10857537   |
| Mouse monoclonal anti-NF-κB p65 (L8F6)                       | 1:500 | IF | Cell Signaling Technology | Ca#6956; RRID: AB_10828935      |
| Mouse monoclonal anti-CD68 Alexa Fluor® 647 (clone FA-11)    | 1:50  | FC | BioLegend                 | Ca#137003; RRID: AB_2044001     |
| Mouse monoclonal anti-CD3 PE/Cy7 (clone 145-2C11)            | 1:50  | FC | BioLegend                 | Ca#100320; RRID: AB_312685      |
| Mouse monoclonal anti-CD8a eFluor 450 (clone 53-6.7)         | 1:50  | FC | eBioscience               | Ca#48-0081-82; RRID: AB_1272198 |
| Mouse monoclonal anti-CD4 APC (clone GK1.5)                  | 1:50  | FC | BioLegend                 | Ca#100412; RRID: AB_312697      |
| Mouse/rat/human monoclonal anti-CD27 APC/Cy7 (clone LG.3A10) | 1:50  | FC | BioLegend                 | Ca#124225; RRID: AB_2565791     |
| Mouse monoclonal anti-CD206 Brillant                         | 1:50  | FC | BioLegend                 | Ca#141717; RRID:AB_2562232      |

|                                                 |        |    |                          |                                     |
|-------------------------------------------------|--------|----|--------------------------|-------------------------------------|
| Mouse anti-rabbit IgG-HRP                       | 1:5000 | WB | Santa Cruz Biotechnology | Ca#sc-2357;<br>RRID:<br>AB_628497   |
| Donkey anti-goat IgG-HRP                        | 1:5000 | WB | Santa Cruz Biotechnology | Ca#sc-2020;<br>RRID:AB_63172<br>8   |
| Donkey anti-rat IgG (H+L)<br>Alexa Fluor® 488   | 1:500  | IF | Life technologies        | Ca#A21208;<br>RRID:<br>AB_141709    |
| Donkey anti-rabbit IgG<br>Alexa Fluor® 568      | 1:500  | IF | Life technologies        | Ca#A10042;<br>RRID:<br>AB_2534017   |
| Donkey anti-mouse IgG<br>(H+L) Alexa Fluor® 647 | 1:500  | IF | Life technologies        | Ca#A31571;<br>RRID:<br>AB_162542    |
| Donkey anti-goat IgG (H+L)<br>Alexa Fluor® 633  | 1:500  | IF | Life technologies        | Ca#A21082;<br>RRID:<br>AB_141493    |
| Donkey anti-goat IgG H&L<br>Alexa Fluor® 405    | 1:500  | IF | Life technologies        | Ca#ab175664;<br>RRID:<br>AB_2313502 |
| Donkey anti-mouse IgG<br>(H+L) Alexa Fluor® 488 | 1:500  | IF | Life technologies        | Ca#A21202;<br>RRID:<br>AB_141607    |
| Donkey anti-rat IgG (H+L)<br>Alexa Fluor® 594   | 1:500  | IF | Life technologies        | Ca#A21209;<br>RRID:<br>AB_2535795   |

**Appendix Table S2.** List of primers

| <b>Gen</b>   | <b>Sequence</b>            | <b>UPL</b> |
|--------------|----------------------------|------------|
| huSod1 for   | tctggatagaggattaaagtgagga  | 40         |
| huSod1 rev   | tccatgttcatgagtttgagat     | 40         |
| hulkk2 for   | agacagcacaacaaccagca       | 61         |
| hulkk2 rev   | ccgtcgactgggctagag         | 61         |
| C3 for       | ttgtagagctgctggtcagg       | 76         |
| C3 rev       | acctacctcggaagttct         | 76         |
| Lcn2 for     | tctgatccagtagcgacagc       | 58         |
| Lcn2 rev     | ccatctatgagctacaagagaacaat | 58         |
| Ccl2 for     | gatcatctgctgggaatgagt      | 62         |
| Ccl2 rev     | catccacgtgttgctca          | 62         |
| MadCam for   | ataggacgacggtggagga        | 72         |
| MadCam rev   | gggcaggtgaccaatctgta       | 72         |
| CtsS for     | ggagtgagcaccacacttca       | 92         |
| CtsS rev     | gcatccaaaacagccatctt       | 92         |
| C1q for      | ggagcatccagttgatcg         | 16         |
| C1q rev      | catccctgagaggtctccat       | 16         |
| Gfap for     | ccaactgcaggccttgac         | 109        |
| Gfap rev     | gctctagggactcgttcgtg       | 109        |
| Vimentin for | tgcgccagcagtatgaaa         | 79         |
| Vimentin rev | gcctcagagaggtcagcaaaa      | 79         |
| Olfm3 for    | ctgctgctccttctttttg        | 56         |
| Olfm3 rev    | ctactctgatcctggcattgg      | 56         |
| Tmem119 for  | gtcactccatcccagttcac       | 110        |

|                   |                           |     |
|-------------------|---------------------------|-----|
| Tmem119 rev       | ggaccatgttgagctatggaa     | 110 |
| Tnf- $\alpha$ for | gaggccatttgggaacttct      | 49  |
| Tnf- $\alpha$ rev | tgctatgtctcagcctcttc      | 49  |
| IL1- $\beta$ for  | tcttcttgggtattgcttgg      | 78  |
| IL1- $\beta$ rev  | tgtaatgaaagacggcacacc     | 78  |
| IL1- $\alpha$ for | ttggtaaatacctgcaaca       | 52  |
| IL1- $\alpha$ rev | ttggtaaatacctgcaaca       | 52  |
| IL-6 for          | ccaggtagctatggactccagaa   | 6   |
| IL-6 rev          | gctaccaaactggatataatcagga | 6   |
| Inf- $\gamma$ for | ttcaagacttcaagagtctgagg   | 21  |
| Inf- $\gamma$ rev | tctggaggaactggcaaaag      | 21  |
| Tgf- $\beta$ for  | gtcagcagccggtacca         | 72  |
| Tgf- $\beta$ rev  | tggagcaacatgtggaac        | 72  |
| Wnt1 for          | tactggcactgaccgtct        | 25  |
| Wnt1 rev          | cttggaatccgtcaacaggt      | 25  |
| Wnt 2 for         | cagagatcacagcctcttgg      | 101 |
| Wnt2 rev          | gcgtaaacaaggccgatt        | 101 |
| Wnt2 $\beta$ for  | ccgggaccacactgtcttt       | 16  |
| Wnt2 $\beta$ rev  | gctgacgagatagcatagacga    | 16  |
| Wnt 3 for         | ctcgtggctaccaattt         | 81  |
| Wn3 rev           | gaggccagagatgtgtactgc     | 81  |
| Wnt4 for          | actggactccctcctgtct       | 62  |
| Wnt4 rev          | tgccctgtcactgcaaa         | 62  |
| Wnt5 $\alpha$ for | ggaccatgttgagctatggaa     | 71  |
| Wnt5 $\alpha$ rev | cttctcctgagggcatcg        | 71  |
| Wnt5 $\beta$ for  | agcaccgtggacaacacat       | 53  |

|                   |                       |    |
|-------------------|-----------------------|----|
| Wnt5 $\beta$ rev  | aaggcagtctctcggctacc  | 53 |
| Wnt6 for          | gtgcaactgcacaacaacg   | 62 |
| Wnt6 rev          | ggaacggaggcagcttct    | 62 |
| Wnt7 $\alpha$ for | cgctgggagagcgtactg    | 12 |
| Wnt7 $\alpha$ rev | cgataatcgcataggtgaagg | 12 |
| Wnt7 $\beta$ for  | gcgtcctctacgtgaagctc  | 49 |
| Wnt7 $\beta$ rev  | tctgttgacagatgatgttg  | 49 |
| Wnt8 $\beta$ for  | gcctcggagacttgacaac   | 76 |
| Wnt8 $\beta$ rev  | ctcccagagccaacctt     | 76 |
| Wnt10 $\beta$ for | aatcggatccacaacaac    | 27 |
| Wnt10 $\beta$ rev | ctccaacaggtcttgaattgg | 27 |
