# Supplementary figures and images for: NF‐κB activation in astrocytes drives a stage‐specific beneficial neuroimmunological response in ALS
Source: PubMed Central journal article supplement — EMBO J. 2018 Jun 6;37(16):e98697. doi: 10.15252/embj.201798697 (PMC6092622; doi:10.15252/embj.201798697), 2018-06-06

Figure 1 E

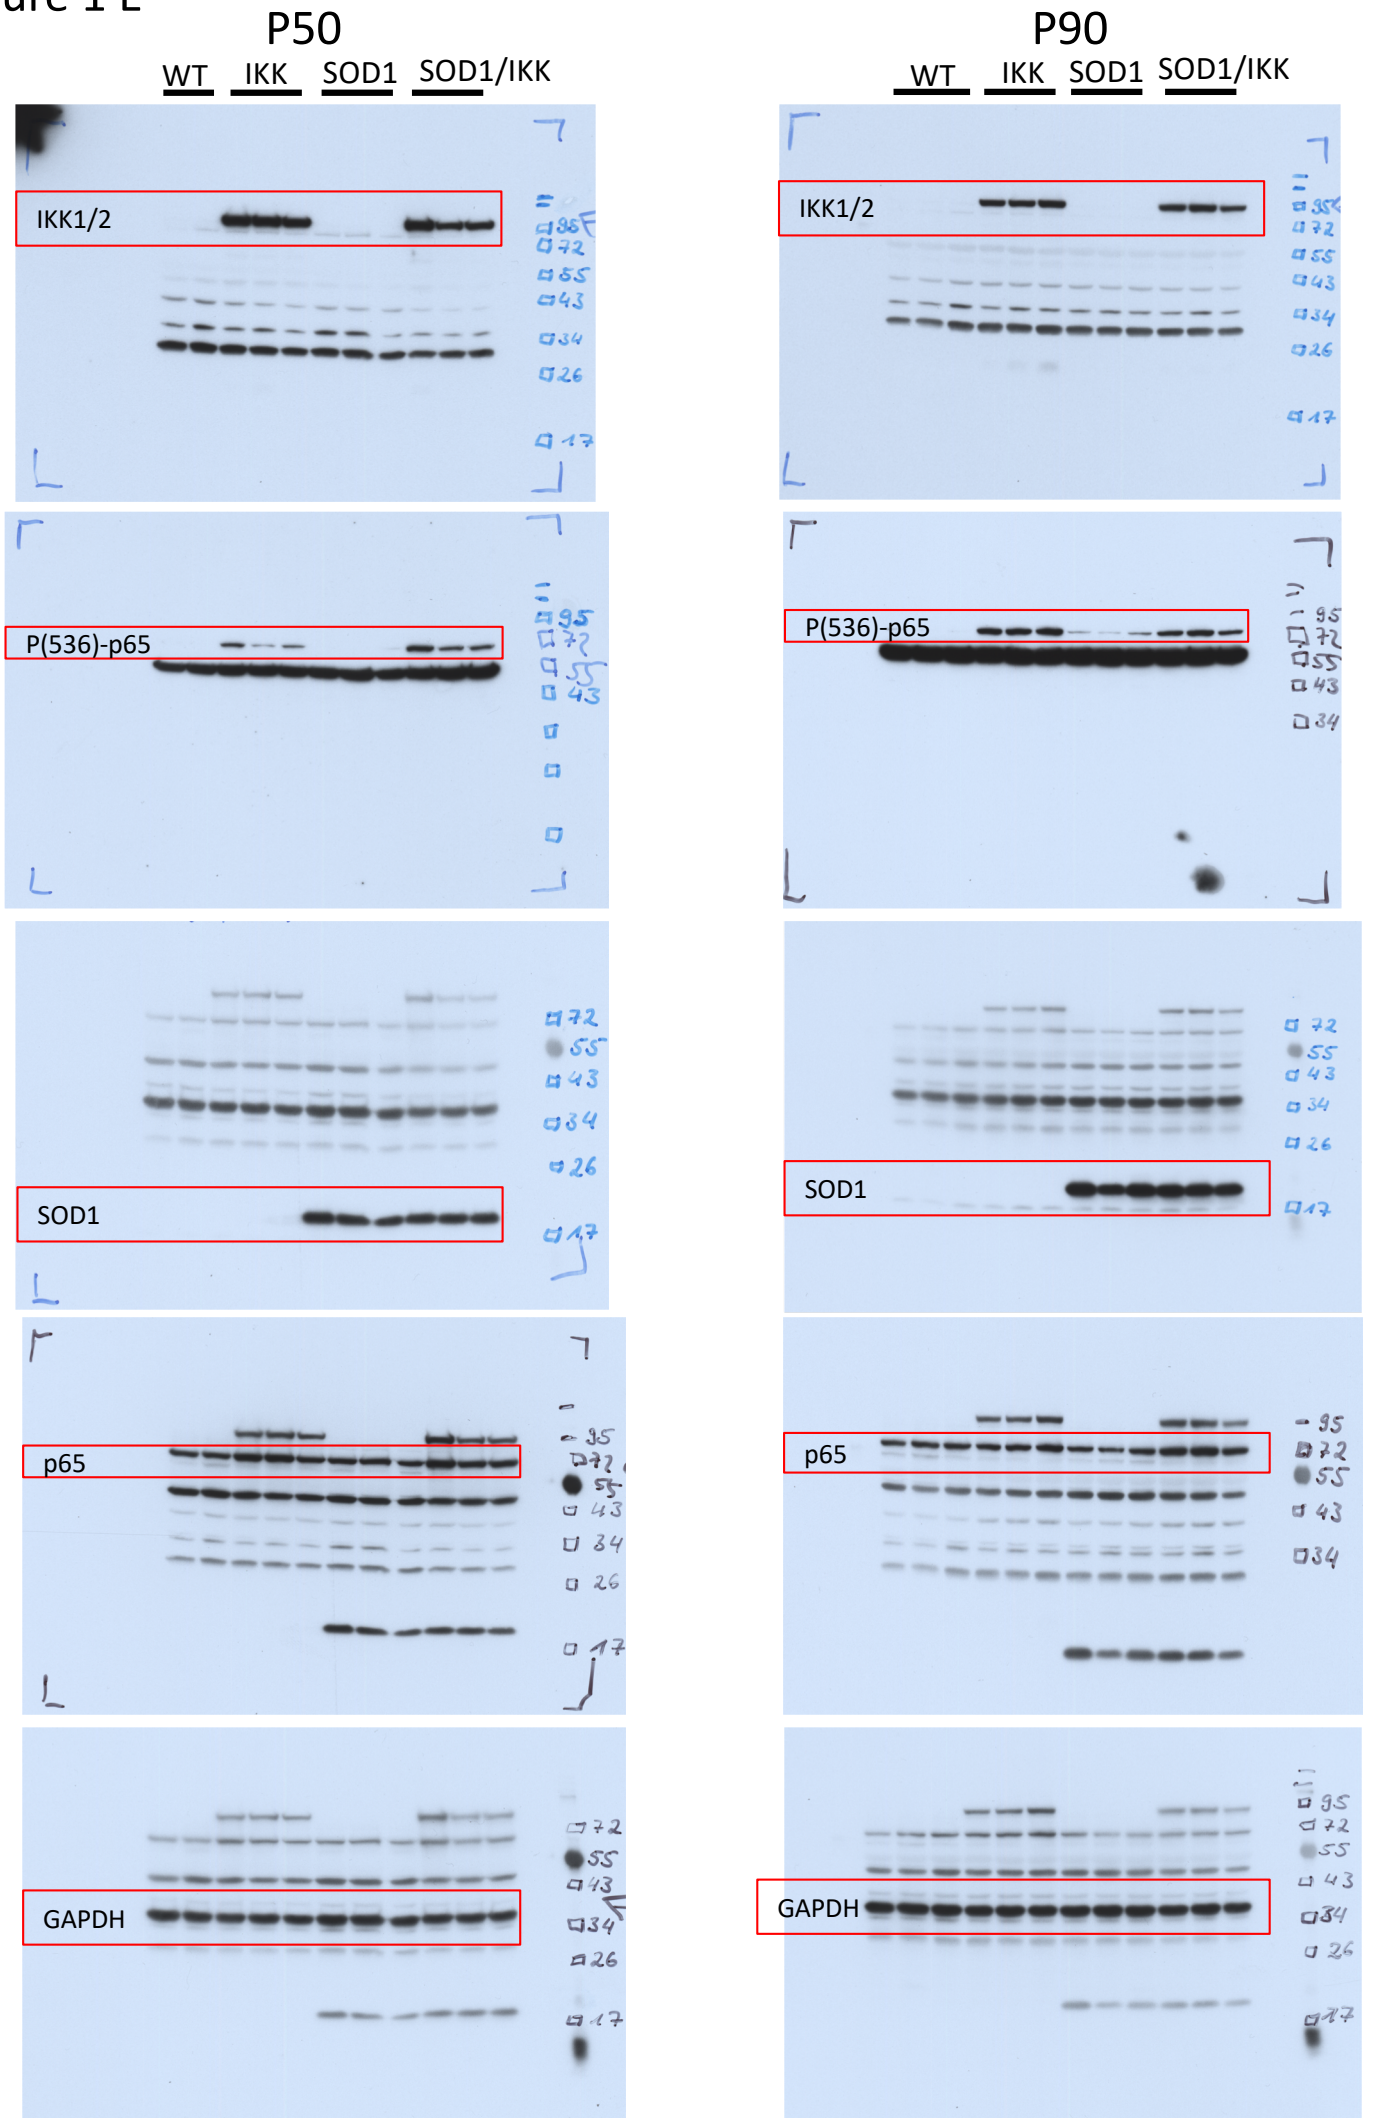

Supplement: EMBJ-37-e98697-s006.pdf [file EMBJ-37-e98697-s006.pdf]
